# Supplementary material for: Inhibition of Malaria Infection in Transgenic Anopheline Mosquitoes Lacking Salivary Gland Cells
Source: PubMed Central journal article supplement (PMC5012584; doi:10.1371/journal.ppat.1005872), 2016-09-06
Supplement: ppat.1005872.s009.pdf [file ppat.1005872.s009.pdf]

S1 Table. Comparison of the number of eggs laid between wild-type and AAPP-mBax mosquitoes.

| Group                                        | Wild-Type<br>(n = 19) | AAPP-mBax<br>(n = 18) |
|----------------------------------------------|-----------------------|-----------------------|
| Number of eggs*, **<br>(mean ± SEM)          | 90.5 ± 7.2            | 89.8 ± 9.2            |
| Number of females laid<br>hatched eggs       | 17                    | 16                    |
| Hatchability <sup>§, ¶</sup><br>(mean ± SEM) | 0.57 ± 0.08           | 0.69 ± 0.09           |
| Range of egg hatchability                    | 0 – 0.98              | 0 – 1.00              |

\*: Four- to seven-day-old female adults were fed the blood of mice, and females were allowed to lay eggs individually 4 to 7 days after blood feeding.

\*\* : There was no significant difference between transgenic and wild-type mosquitoes.  $P = 0.9489$  (the Student's  $t$ -test).

§: Average fraction of hatched eggs

¶: There was no significant difference between transgenic and wild-type mosquitoes.  $P = 0.2606$  (the Mann-Whitney  $U$  test).
